1 GWAS and PheWAS of Red Blood Cell Components in a Northern Nevadan Cohort

2

3 Karen A. Schlauch<sup>1</sup>, Robert W. Read<sup>1</sup>, Gai Elhanan<sup>1</sup>, William J Metcalf<sup>1</sup>, Anthony D. Slonim<sup>2</sup>, Ramsey  
4 Aweti<sup>3</sup>, Robert Borkowski<sup>3</sup>, and Joseph J. Grzymiski<sup>1,2</sup>

5

6 **1. Applied Innovation Center, Renown Institute for Health Innovation, Desert Research Institute,**

7 **Reno, NV, USA**

8 **2. Renown Health, Reno, NV, USA**

9 **3. 23andMe, Inc. Mountain View, CA, USA**

10

11

12 Correspondence: Joseph J. Grzymiski

13 \*E-mail: [joeg@dri.edu](mailto:joeg@dri.edu) (JG)

14

15

16

## 17 **Abstract**

18 In this study, we perform a full genome-wide association study (GWAS) to identify statistically  
19 significantly associated single nucleotide polymorphisms (SNPs) with three red blood cell (RBC)  
20 components and follow it with two independent PheWASs to examine associations between phenotypic  
21 data (case-control status of diagnoses or disease), significant SNPs, and RBC component levels. We  
22 first identified associations between the three RBC components: mean platelet volume (MPV), mean  
23 corpuscular volume (MCV), and platelet counts (PC), and the genotypes of approximately 500,000  
24 SNPs on the Illumina Infinium® DNA Human OmniExpress-24 BeadChip using a single cohort of  
25 4,700 Northern Nevadans. Twenty-one SNPs in five major genomic regions were found to be  
26 statistically significantly associated with MPV, two regions with MCV, and one region with PC, with  
27  $p < 5 \times 10^{-8}$ . Twenty-nine SNPs and nine chromosomal regions were identified in 30 previous GWASs,  
28 with effect sizes of similar magnitude and direction as found in our cohort. The two strongest  
29 associations were SNP rs1354034 with MPV ( $p = 2.4 \times 10^{-13}$ ) and rs855791 with MCV ( $p = 5.2 \times 10^{-12}$ ). We  
30 then examined possible associations between these significant SNPs and incidence of 1,488 phenotype  
31 groups mapped from International Classification of Disease version 9 and 10 (ICD9 and ICD10) codes  
32 collected in the extensive electronic health record (EHR) database associated with Healthy Nevada  
33 Project consented participants. Further leveraging data collected in the EHR, we performed an  
34 additional PheWAS to identify associations between continuous red blood cell (RBC) component  
35 measures and incidence of specific diagnoses. The first PheWAS illuminated whether SNPs associated  
36 with RBC components in our cohort were linked with other hematologic phenotypic diagnoses or  
37 diagnoses of other nature. Although no SNPs from our GWAS were identified as strongly associated to  
38 other phenotypic components, a number of associations were identified with  $p$ -values ranging between  
39  $1 \times 10^{-3}$  and  $1 \times 10^{-4}$  with traits such as respiratory failure, sleep disorders, hypoglycemia,  
40 hyperglycemia, GERD and IBS. The second PheWAS examined possible phenotypic predictors of

41 abnormal RBC component measures: a number of hematologic phenotypes such as thrombocytopenia,  
42 anemias, hemoglobinopathies and pancytopenia were found to be strongly associated to RBC  
43 component measures; additional phenotypes such as (morbid) obesity, malaise and fatigue, alcoholism,  
44 and cirrhosis were also identified to be possible predictors of RBC component measures.

45

## 46 **Author Summary**

47 The combination of electronic health records and genomic data have the capability to revolutionize  
48 personalized medicine. Each separately contains invaluable data; however, combined, the two are able  
49 to identify new discoveries that may have long-term health benefits. The Healthy Nevada Project is a  
50 non-profit initiative between Renown Medical Center and the Desert Research Institute in Reno, NV.  
51 The project has so far collected a cohort of 6,500 Northern Nevadans, with extensive medical  
52 electronic health records in the Renown Health database. Combining the genotypes of these  
53 participants with the clinical data, this study's aim is to find associations between genotypes (genes)  
54 and phenotypes (diagnoses and lab records). Here, we identify and examine clinical associations with  
55 red blood cell components such as platelet counts and mean platelet volume. These are components that  
56 have clinical relevance for several diseases, such as anemia, atherothrombosis and cancer. Our results  
57 from genome wide association studies mirror previous studies, and identify new associations. The  
58 extensive electronic health records enabled us to perform phenome wide associations to discover strong  
59 associations with hematologic components, as well as other important traits and diagnoses.

60

## 61 **Introduction**

62 The complete blood count (CBC) is a widely used medical diagnostic test that is a compilation of the  
63 number, size, and composition of various components of the hematopoietic system. Abnormal CBC  
64 measures may indicate illness or disease. Mean corpuscular volume (MCV), platelet count (PC), and

65 mean platelet volume (MPV) are specific CBC characteristics (hereby called RBC components), and  
66 linked to complex disorders such as anemia, alpha thalassemia and cardiovascular disease [1-5].  
67 Platelets are involved in vascular integrity, wound healing, immune and inflammatory responses, and  
68 tumor metastasis; the role of platelets is also paramount in hemostasis and in the pathophysiology of  
69 atherothrombosis and cancer [6-12]. Additionally, abnormally high mean platelet volumes (MPV) are  
70 considered a predictor of post event outcome in coronary disease and myocardial infarction [13].  
71 Furthermore, studies have shown that individuals living in higher altitudes have noted differences in  
72 red blood cell components than at sea level. At approximately 4,400 feet above sea level, Northern  
73 Nevada, where this study is conducted, is considered a high desert in the Sierra Nevada foothills. Alper  
74 showed that mean platelet volume (MPV) is 7.5% higher at altitudes greater than 4,000 feet than at sea  
75 level [14]. Similarly, Hudson showed a notable and statistically significant positive correlation with  
76 platelet counts (PC) and altitude [15], while mean corpuscular volume (MCV) was recorded as lower at  
77 higher altitudes than at sea level [16]. As RBCs help transport oxygen throughout the entire body, the  
78 identification of RBC-related genotypic mutations, especially in an RBC high-turnover environment is  
79 valuable. Lastly, the identification of genomic regions with roles in megakaryopoiesis and platelet  
80 formation, as well as neoplastic conditions like polycythemia vera and essential thrombocytosis (ET)  
81 [17,18], may help identify those that have a higher risk of certain complex RBC diseases.

82

83 Given the importance of these three RBC components, we conducted a study to identify both genetic  
84 and phenotypic associations with all three characteristics via GWASs and PheWASs. Our study begins  
85 with the Healthy Nevada Project, a single cohort formed in 2016 to investigate factors that may  
86 contribute to health outcomes in Northern Nevada. Its first phase provided 10,000 individuals in  
87 Northern Nevada with genotyping on the 23andMe 2016 Illumina Human OmniExpress-24 BeadChip  
88 platform at no cost. Renown Hospital is the largest hospital in the area, and 75% of these 10,000  
89 individuals are cross-referenced in its extensive EHR database

90

91 As noted above, previous GWASs have identified significant genetic links with all three RBC  
92 components we examine in this study, MPV, MCV and PC [13,17-45]. Lin et al. 2007 identified a  
93 strong genetic link with MCV in region 11p15 using the Framingham cohort [19]; Kullo et al. 2010  
94 leveraged EHR data from the Mayo Clinic to detect four genes strongly associated with at least one of  
95 the three RBC components [27]. Similarly, a number of regions were linked with PC in an African  
96 American cohort [35] and MPV [35]; Shameer detected five regions associated with PC and eight with  
97 MPV [18].

98

99 Our study first performed a genome-wide association study (GWAS) of 4,700 genotyped Northern  
100 Nevadans who have at least one recorded value for one of the three RBC components MPV, MCV and  
101 PC to examine the genetic component of these components. We found 38 SNPs to be statistically  
102 significantly associated ( $p < 5 \times 10^{-8}$ ) to one of the three RBC components. Many of these associations  
103 were previously reported, yet our study did identify nine novel SNPs in six different regions. While  
104 there were few new associations discovered in our cohort, we identified several SNPs that fall within  
105 genes influencing megakaryocytes maturation, platelet volume, platelet signaling and diseases such as  
106 anemia. Further, with extensive linked electronic medical record (EMR) data, we had the ability to  
107 perform a PheWAS of 1,488 standard lab results (phenotypes) against each SNP found to be associated  
108 to RBC components in the Northern Nevadan cohort to examine pleiotropy. Additionally, we then  
109 examined the RBC components phenotypically, using linked electronic medical record (EMR) data to  
110 determine the relationship between measures of each component and a variety of clinical conditions  
111 recorded in patients. Many relevant and strongly statistically significant associations were identified,  
112 especially with hematologic components; other traits not currently shown to be linked to RBC  
113 components, such as obesity, alcoholism and cirrhosis, were also detected.

114

## 115 **Results**

### 116 *Characteristics of cohort*

117 We examined 4,700 genotyped individuals with at least one recorded RBC measure; 4,590 individuals  
118 in the cohort had measures for all three components. Table 1 describes the cohort with respect to  
119 gender, age, ethnic origin, and standardized value of each RBC component. Note that all values for  
120 each component were standardized to the most current lab test administered for that component via  
121 linear transformation. The normal (healthy) reference values to which all individual records were  
122 standardized are also presented in Table 1. The mean standardized RBC component values for each  
123 individual are available in Supplementary Table S1.

124 **Table 1. Cohort Characteristics**

|                      |                                      |                                |
|----------------------|--------------------------------------|--------------------------------|
| Age (years)          | 47.24 ± 15.82                        |                                |
| Male (%)             | 1328 (28.24)                         |                                |
| African American (%) | 53 (1.12)                            |                                |
| Asian (%)            | 100 (2.12)                           |                                |
| Caucasian (%)        | 4,202 (89.35)                        |                                |
| Latino (%)           | 138 (2.93)                           |                                |
| Native American (%)  | 30 (0.64)                            |                                |
| Pacific Islander (%) | 11 (0.23)                            |                                |
| Unknown (%)          | 168 (3.6)                            |                                |
|                      | <b>Standardized Component levels</b> | <b>Normal Reference Ranges</b> |
| MPV (fL)             | 10.58 ± 0.98                         | [9, 12.9] (fL)                 |
| MCV (fL)             | 91.53 ± 4.47                         | [81.4, 97.8] (fL)              |
| PC (K/uL)            | 251.57 ± 62.23                       | [164, 446] (K/uL)              |

125 Table of cohort characteristics. Continuous variables are presented as mean ± SD; categorical variables  
126 are presented as counts and percentages. All values were standardized to the reference ranges of the  
127 most recent administered laboratory test.  
128

### 129 *GWAS of RBC components*

130 Using the average measures of each individual's MPV, PC and MCV lab records, a standard GWAS  
131 under the additive model with adjustments for gender, age and the first four principal components was

132 performed using *PLINK* 1.9. Genomic inflation coefficients ( $\lambda$ ) were computed for each cohort:  
133 1.031 for MPV, 1.027 for PC, and 1.045 for MCV.  
134 Any SNP with an association  $p$ -value of  $p < 5 \times 10^{-8}$  was considered a statistically significant association,  
135 following current standards [28,32,46,47]. The percentage of phenotypic variance attributed to genetic  
136 variation was computed with a combination of *PLINK* and GCTA [48]: genetic variance was 35.3% for  
137 MCV; 32.2% for MPV; 20.7% for PC. The three individual GWAS studies identified a total of 38  
138 SNPs that associated with a RBC component with statistical significance. Manhattan plots of the three  
139 GWAS results are presented in Supplemental Figure S1(A-C). As an example for the reader, we  
140 include in the manuscript (Fig. 1), a Manhattan plot for MCV.

141

#### 142 *MPV*

143 A GWAS was performed on a cohort of 4,591 genotyped participants with MPV laboratory measures.  
144 We identified 21 SNPs across five different chromosomal regions that reached genome-wide  
145 significance ( $p < 5 \times 10^{-8}$ ; Table 2). Of these, 13 demonstrated previous associations in at least one other  
146 study, with six associated with RBC components (Supplementary Table S2)  
147 [13,17,18,25,28,30,33,35,49-58]. All five significant chromosomal regions were previously associated  
148 with MPV[17,18]. The fifth region 18q22.2, contains three SNPs associated in our cohort with average  
149  $p$ -value  $p = 3.86 \times 10^{-9}$ , however none of the individual SNPs have been previously associated with MPV.  
150 Results are presented in Table 2.

#### 151 **Table 2. Statistically Significant GWAS SNPs**

| rsID       | Chrom | Cyto Region | Associated Gene | Minor Allele | MAF   | $\beta$ | (SE)  | GWAS $p$ -value       | Mutation Classification | RBC |
|------------|-------|-------------|-----------------|--------------|-------|---------|-------|-----------------------|-------------------------|-----|
| rs10274553 | chr3  | p14.3       | ARHGEF3         | C            | 49.74 | -0.1198 | 0.020 | $3.82 \times 10^{-9}$ | intron                  | MPV |
| rs10509186 | chr3  | p14.3       | ARHGEF3         | T            | 45.55 | -0.1187 | 0.021 | $7.75 \times 10^{-9}$ | intron                  | MPV |
| rs10822186 | chr7  | q22.3       | NA              | G            | 49.22 | -0.1107 | 0.020 | $4.38 \times 10^{-8}$ | unknown                 | MPV |
| rs11130549 | chr7  | q22.3       | NA              | C            | 34.11 | -0.1238 | 0.022 | $9.94 \times 10^{-9}$ | unknown                 | MPV |
| rs12355784 | chr7  | q22.3       | NA              | A            | 45.46 | -0.1184 | 0.021 | $9.32 \times 10^{-9}$ | unknown                 | MPV |

|             |       |        |         |   |       |         |       |                        |                        |     |
|-------------|-------|--------|---------|---|-------|---------|-------|------------------------|------------------------|-----|
| rs1354034   | chr7  | q22.3  | NA      | T | 41.14 | 0.1546  | 0.021 | 2.39x10 <sup>-13</sup> | unknown                | MPV |
| rs1788103   | chr7  | q22.3  | NA      | G | 48.18 | -0.1261 | 0.020 | 5.15x10 <sup>-10</sup> | unknown                | MPV |
| rs1790588   | chr7  | q22.3  | NA      | C | 48.01 | -0.1273 | 0.020 | 3.31x10 <sup>-10</sup> | unknown                | MPV |
| rs1790974   | chr10 | q21.3  | JMJD1C  | T | 43.82 | -0.1128 | 0.020 | 3.32x10 <sup>-8</sup>  | intron                 | MPV |
| rs1935      | chr10 | q21.3  | JMJD1C  | G | 45.58 | -0.1135 | 0.021 | 3.57x10 <sup>-8</sup>  | intron                 | MPV |
| rs201979226 | chr10 | q21.3  | JMJD1C  | C | 48.78 | 0.1183  | 0.020 | 5.89x10 <sup>-9</sup>  | intron, near-gene-5    | MPV |
| rs342240    | chr10 | q21.3  | JMJD1C  | A | 41.36 | 0.129   | 0.021 | 3.49x10 <sup>-10</sup> | intron, untranslated-3 | MPV |
| rs342275    | chr10 | q21.3  | JMJD1C  | T | 41.9  | 0.1292  | 0.020 | 2.96x10 <sup>-10</sup> | intron                 | MPV |
| rs342293    | chr10 | q21.3  | JMJD1C  | G | 44.31 | 0.1325  | 0.020 | 6.61x10 <sup>-11</sup> | missense               | MPV |
| rs342296    | chr10 | q21.3  | REEP3   | A | 44.03 | 0.131   | 0.020 | 1.04x10 <sup>-10</sup> | intron                 | MPV |
| rs34818942  | chr12 | q24.31 | WDR66   | T | 7.29  | 0.254   | 0.039 | 7.77x10 <sup>-11</sup> | intron                 | MPV |
| rs386614085 | chr12 | q24.31 | RHOF    | G | 45.45 | -0.1172 | 0.021 | 1.21x10 <sup>-8</sup>  | intron                 | MPV |
| rs4379723   | chr18 | q22.2  | CD226   | C | 45.45 | -0.1172 | 0.021 | 1.29x10 <sup>-8</sup>  | missense               | MPV |
| rs763361    | chr18 | q22.2  | CD226   | T | 47.24 | -0.1273 | 0.020 | 3.26x10 <sup>-10</sup> | intron                 | MPV |
| rs7910927   | chr18 | q22.2  | CD226   | G | 45.52 | -0.1146 | 0.021 | 2.68x10 <sup>-8</sup>  | intron                 | MPV |
| rs7961894   | chr18 | q22.2  | DOK6    | T | 10.24 | 0.2221  | 0.033 | 2.68x10 <sup>-11</sup> | untranslated-3         | MPV |
|             |       |        |         |   |       |         |       |                        |                        |     |
| rs218237    | chr4  | q12    | NA      | T | 15.19 | 0.740   | 0.126 | 5.07x10 <sup>-9</sup>  | unknown                | MCV |
| rs9402686   | chr6  | q23.3  | NA      | A | 24.89 | 0.647   | 0.104 | 4.60x10 <sup>-10</sup> | unknown                | MCV |
| rs7776054   | chr6  | q23.3  | NA      | G | 24.28 | 0.645   | 0.104 | 6.65x10 <sup>-10</sup> | unknown                | MCV |
| rs9399137   | chr6  | q23.3  | NA      | C | 23.83 | 0.648   | 0.105 | 7.82x10 <sup>-10</sup> | unknown                | MCV |
| rs7775698   | chr6  | q23.3  | NA      | T | 24.23 | 0.642   | 0.104 | 8.24x10 <sup>-10</sup> | unknown                | MCV |
| rs4895441   | chr6  | q23.3  | NA      | G | 25.08 | 0.628   | 0.103 | 1.27x10 <sup>-9</sup>  | unknown                | MCV |
| rs111194878 | chr6  | q23.3  | NA      | A | 25.41 | 0.622   | 0.103 | 1.47x10 <sup>-9</sup>  | unknown                | MCV |
| rs9373124   | chr6  | q23.3  | NA      | C | 26.16 | 0.599   | 0.102 | 5.14x10 <sup>-9</sup>  | unknown                | MCV |
| rs855791    | chr22 | q12.3  | TMPRSS6 | A | 44.2  | -0.621  | 0.090 | 5.23x10 <sup>-12</sup> | missense               | MCV |
| rs4820268   | chr22 | q12.3  | TMPRSS6 | G | 46.56 | -0.604  | 0.090 | 2.65x10 <sup>-11</sup> | coding-synon           | MCV |
| rs5756504   | chr22 | q12.3  | TMPRSS6 | T | 36.93 | 0.567   | 0.092 | 7.77x10 <sup>-10</sup> | intron                 | MCV |
| rs130624    | chr22 | q12.3  | NA      | G | 42.77 | 0.549   | 0.090 | 1.13x10 <sup>-9</sup>  | unknown                | MCV |
| rs5756506   | chr22 | q12.3  | TMPRSS6 | C | 36.92 | 0.563   | 0.092 | 1.15x10 <sup>-9</sup>  | intron                 | MCV |
| rs386563505 | chr22 | q12.3  | NA      | A | 40.75 | 0.525   | 0.091 | 7.12x10 <sup>-9</sup>  | unknown                | MCV |
|             |       |        |         |   |       |         |       |                        |                        |     |
| rs385893    | chr9  | p24.1  | NA      | T | 49    | -7.744  | 1.258 | 8.04x10 <sup>-10</sup> | unknown                | PC  |
| rs10974808  | chr9  | p24.1  | RCL1    | G | 11.48 | 11.490  | 1.943 | 3.53x10 <sup>-9</sup>  | intron                 | PC  |
| rs423955    | chr9  | p24.1  | NA      | C | 34.17 | -7.387  | 1.325 | 2.64x10 <sup>-8</sup>  | near-gene-5            | PC  |

152 This table lists the statistically significant SNPs associated in our cohort with MPV, MCV, and PC.

153 Effect sizes and their standard deviations are presented in fL per each copy of the minor allele. Raw *p*-

154 values generated by the GWAS are presented.

155

156 *MCV*



157 A GWAS was performed on a cohort of 4,699 genotyped participants with MCV laboratory measures.  
158 There were 14 SNPS that were significantly associated with MCV (Table 2). These SNPs lie in three  
159 chromosomal regions: predominantly in 6q23.3 and 22q12.3. These two regions have detailed  
160 annotation and were linked previously with MCV (Supplementary Table S2) [20,27,32]. All but four of  
161 the SNPs are in non-coding regions. These four SNPs lie in *TMPRSS6*. The gene *TMPRSS6* codes for  
162 the protein matriptase-2, which is part of a signaling pathway that regulates blood iron levels [31]. The  
163 two SNPS rs855791 and rs4820268 showed the strongest association with MCV ( $p < 1 \times 10^{-11}$ ). These  
164 two SNPS also lie in *TMPRSS6* and cause a missense and synonymous mutation, respectively. Results  
165 are presented in Table 2.

166

#### 167 *PC*

168 A GWAS was performed on a cohort of 4,700 genotyped participants with PC laboratory measures.  
169 Three SNPs were identified with statistically significant ( $p < 5 \times 10^{-8}$ ) links to PC values in our cohort,  
170 two of which were previously identified in other studies (Supplementary Table S2) [17,25,26,34]. The  
171 SNP rs10974808 is in the same cytoband region (9p24.1) as the others but has not been linked to PC.  
172 The three SNPs have different effects on PC: rs385893 and rs423955 have negative effect size ( $\beta = -$   
173 7.744 and -7.387, respectively), while rs10974808 has a positive effect ( $\beta = 11.490$ ). The minor allele  
174 frequency of rs10974808 is much rarer (MAF=11.48%) compared to 49% for rs385893 and 31.17% for  
175 rs423955. Results are presented in Table 2.

176

#### 177 *Comparison to other GWAS studies*

178 The Northern Nevada cohort had mean standardized MPV values of  $10.58 \pm 0.98$  fL, comparable to  
179 levels reported in the Health ABC cohort described in Qayyum ( $10.9 \pm 1.6$  fL), and two European  
180 cohorts investigated in Geiger ( $10.53 \pm 1.08$ ,  $10.83 \pm 0.87$ ) [28,35]. The Nevadan cohort had MCV  
181 values of  $91.53 \pm 4.5$  fL, also comparable to those described in Kullo ( $90.5 \pm 4.2$  fL) and Ding in the

182 Mayo and Johns Hopkins Group Health Cooperative cohorts ( $90.53 \pm 4.17$  and  $91.56 \pm 4.49$ ,  
183 respectively), as well as several European cohorts in Geiger (e.g.,  $91.5 \pm 4.2$ ,  $91.4 \pm 4.41$ ,  $91.1 \pm 4.44$ ,  
184  $92.0 \pm 4.3$ ) [27,28,32]. Mean standardized PC values in the Nevadan cohort ( $251 \pm 62.23$  K/uL) were  
185 very similar to many of the cohorts examined in Geiger (e.g.,  $258.6 \pm 63.1$ ,  $252 \pm 71.7$ ,  $250.9 \pm 64.8$ ,  
186  $247 \pm 64.7$ ) [28].

187

188 Our three GWAS results were in close correlation with many of the other studies. For example, the  
189 locus rs7961894 in the WDR66 gene on q24.31 was found associated to MPV in our cohort and in  
190 Meisinger as a top hit [24]. Effect sizes in Meisinger were larger than ours (1.03 vs. 0.22), but the  
191 number of minor alleles predicted an increase in MPV for both studies. Another SNP, rs342240, was  
192 one of our cohort's top associations with MPV, and was also identified by Shameer and Soranzo as  
193 significant links to MPV [17,18]. Similarly, locus rs385893 was identified as a possible predictor of PC  
194 by Soranzo and our cohort, with very similar notably large negative effect sizes ( $-6.24$  and  $-7.74$ ,  
195 respectively). Kullo also found SNP rs7775698 to be significantly associated to MCV, with similar  
196 positive effect sizes as our study ( $0.92$  vs  $0.56$ ) [27]. Soranzo et al. identified rs9402686 as a top link  
197 with MCV, and again, effect sizes were similar to ours ( $0.82$  vs  $0.65$ ) [17].

198

199 *ANOVA*

200 The mean component values across genotypes presented in Supplementary Table S2 correlate with  
201 negative and positive effect sizes: SNPs showing a negative effect size have a decrease in component  
202 values across the genotypes from left to right (homozygous in major allele, heterozygous, homozygous  
203 in minor allele). All ANOVA *p*-values of the significant SNPs identified in this study are significant,  
204 even after a simple Bonferonni correction ( $.05/38=0.001$ ). A box and whisker figure of ANOVA results  
205 for the top hit SNP rs7961894 are shown in Supplementary Fig S2.

206

207 *PheWAS of RBC components*

208 The first PheWAS examined possible associations between significant SNPs identified in each RBC  
209 trait GWAS and 1,488 phenotypic groups. At significance levels  $1 \times 10^{-4} < p < 1 \times 10^{-3}$ , putative  
210 associations of MCV-specific SNPs included respiratory failure; those with PC included GERD and  
211 other diseases of the esophagus. Our study also showed links with MPV-associated SNPs and skin  
212 cancer, hypoglycemia, hyperglyceridemia, IBS, among others. These associations are outlined in  
213 Supplementary Figs S3(A-C).

214

215 The second PheWAS investigated whether the 1,488 phenotype groups were associated with the levels  
216 of each RBC component; more specifically, the analysis identified whether the number of cases in a  
217 phenotype group was a predictor of the level of the component. For example, the PheWAS examining  
218 associations of MPV levels presented significant links with thrombocytopenia and purpura ( $p < 1 \times 10^{-8}$ ).  
219 Interestingly, Vitamin D deficiency was also shown to be a predictor of MPV levels, although at a  
220 lower significance level ( $p < 1 \times 10^{-6}$ ). Incidence of malaise and fatigue was also found to be a potential  
221 predictor of MPV in our cohort.

222

223 Associations with MCV included hemoglobinopathies and hemolytic anemias ( $p < 1 \times 10^{-35}$ ), as well as  
224 iron deficient anemias ( $p < 1 \times 10^{-20}$ ). Again, association with (morbid) obesity was evident ( $p < 1 \times 10^{-20}$ ).  
225 Alcoholism and related liver diseases were associated with MCV at a significance level of  $p < 1 \times 10^{-8}$ ;  
226 abnormal glucose and diabetes were also linked to MCV at  $p < 1 \times 10^{-5}$ . We identified a strong  
227 association in our cohort between platelet counts and thrombocytopenia and purpura ( $p < 1 \times 10^{-30}$ ).  
228 Associations with other hematologic phenotypes such as various anemias and pancytopenia also  
229 reached significance ( $p < 1 \times 10^{-8}$ ). Additionally, (morbid) obesity and cirrhosis were statistically  
230 significantly associated with PC with  $p < 1 \times 10^{-8}$  significance level. These three PheWAS results are

231 shown in Supplementary Fig S4(A-C). As an example for the reader, we include the PheWAS results  
232 for MCV in Fig 2.

233

## 234 Discussion

235 In this study, we first performed three independent GWASs of 4,700 Healthy Nevada Project  
236 participants with 500,000 genotypes against the RBC components: platelet count, mean platelet volume  
237 and mean corpuscular volume. We followed these with two independent PheWASs for each component  
238 to identify additional phenotypic associations with each blood component-significant SNP, and  
239 phenotypic associations with measures of each blood component.

240

241 Our genome-wide association analysis identified ten different chromosomal cytoband regions  
242 associated with at least one RBC component. Nine of those regions were previously associated to RBC  
243 components in other studies; the region 22q13.33 represents a novel region in our study  
244 [17,18,20,25,27,28,30,32,49,59,60]. Nine genes lie in the cytoband regions: their functions are outlined  
245 in Table 3.

246 **Table 3. Table Presenting Gene Functions**

| Gene           | Gene Description                         | Region | RBC | Function                                                                                                               | Reference |
|----------------|------------------------------------------|--------|-----|------------------------------------------------------------------------------------------------------------------------|-----------|
| <i>ARHGEF3</i> | Rho Guanine Nucleotide Exchange Factor 3 | p14.3  | MPV | Increases activity of Rho GTPases by catalyzing the release of bound GDP; may have a role in megakaryocytes maturation | [61]      |
| <i>JMJD1C</i>  | Histone Demethylase                      | q21.3  | MPV | Possible hormone-dependent transcriptional activation                                                                  | [17]      |
| <i>REEP3</i>   | Receptor Accessory Protein 3             | q21.3  | MPV | Membrane protein                                                                                                       | [18]      |
| <i>WDR66</i>   | WD Repeat Domain 66                      | q24.31 | MPV | May create and alter platelet volumes                                                                                  | [24]      |
| <i>RHOF</i>    | Ras Homolog Family Member F              | q24.31 | MPV | May regulate platelet filopodia formation                                                                              | [62]      |
| <i>CD226</i>   | Cluster of Differentiation 226           | q22.22 | MPV | Catalyzes binding of activated platelets to endothelial cells; may have a role in in platelet signal transduction      | [63]      |
| <i>DOK6</i>    | Docking Protein 6                        | q22.2  | MPV | Protein scaffolding                                                                                                    | [64]      |

|                |                                       |        |     |                              |            |
|----------------|---------------------------------------|--------|-----|------------------------------|------------|
| <i>TMPRSS6</i> | Transmembrane Protease, Serine 6      | q12.13 | MCV | Acts by cleaving hemojuvelin | [27,31,38] |
| <i>RCL1</i>    | RNA Terminal Phosphate Cyclase Like 1 | p24.1  | PC  | rRNA processing              | [28]       |

247 This table presents functions of genes associated to all SNPs found significantly associated to one or  
248 more RBC components in the GWASs.

249  
250 Our GWAS results were very similar to previous MPV GWAS associations. The most significant  
251 genetic association with MPV (rs1354034,  $p = 2.39 \times 10^{-13}$ ) is found in an intronic region within  
252 *ARHGEF3* on chromosome 3p14.3. The gene *ARHGEF3* codes for a Rho guanine nucleotide exchange  
253 factor 3 protein and was associated to MPV in previous studies [13,17,18,28,33,61], further  
254 demonstrating that our study was able to replicate associations with RBC components in prior single-  
255 cohort studies. The mechanism by which rs1354034 affects MPV values is still ambiguous. As it lies in  
256 a DNase I hypersensitive region within open chromatin, it could directly affect *ARHGEF3* expression  
257 in human megakaryocytes maturation [61]. Our second most significant association (rs7961894,  $p =$   
258  $2.68 \times 10^{-11}$ ) was also previously linked with MPV [13,18,24,28]. This SNP lies in intron 3 of *WDR66*  
259 on chromosome 12q24.31. Expression levels of *WDR66* have been directly tied to MPV, possibly  
260 indicating that *WDR66* is involved in the establishment of platelet volumes. SNP rs7961894 is not  
261 directly correlated with *WDR66* expression levels, implying an indirect role possibly through other  
262 regulatory mechanisms [24].

263  
264 We also identified several SNPs on chromosome 10q21.3 to be associated with MPV in our cohort that  
265 were linked to sex hormone levels in previous studies [53]. This may imply a possible relationship  
266 between sex hormone levels and MPV. These SNPs almost exclusively lie in *JMJD1C*, a gene that  
267 encodes as a probable histone demethylase, and may have a function in hormone-dependent  
268 transcriptional activation [17]. This could indicate that the transcription of certain hematopoietic target  
269 genes may be enhanced or repressed when specific sex hormones are present; however, the exact  
270 targets and mechanisms have yet to be studied and clinical evidence for such association is scant.

271

272 Further, the chromosomal region 18q22.2 was shown to be associated with MPV [13], although the  
273 significant SNPs in this region have not been linked to MPV in previous studies. Three out of the four  
274 SNPs in this region are intronic to *CD226*, while one is in an untranslated region of *DOK6*. *CD226*  
275 codes for a protein, which mediates the binding of activated platelets to endothelial cells and may  
276 participate in platelet signal transduction [63]. Soranzo et al. also identified this gene as having a  
277 possible role in megakaryocyte (MK) development, thus these SNPs in *CD226* may influence platelet  
278 development [17]. *DOK6* encodes a docking protein, necessary for protein scaffolding, but to our  
279 knowledge has no known relation to platelet function; therefore, the functional relevance of a SNP in  
280 this gene is ambiguous. The mechanism by which these SNPs within 18q22.2 affect *CD226*, *DOK6* or  
281 MPV is also currently unknown.

282

283 The majority of SNPs associated with MCV and PC are in non-coding regions, and most were  
284 previously associated with these components in previous studies [17,27,32,45]. Our two strongest  
285 associations with MCV (rs855791,  $p = 5.23 \times 10^{-12}$ ) and (rs4820268,  $p = 2.65 \times 10^{-11}$ ) are in the gene  
286 *TMPRSS6* and could cause an altered or loss of function for the matriptase-2 protein. Altered function  
287 of the protein will likely influence iron status within the body, demonstrating why these SNPs are  
288 highly associated with anemia caused by iron deficiency [31,38]. PC was associated with only a single  
289 gene in our GWAS. This gene, *RCLI*, which encodes an RNA terminal phosphate cyclase-like 1  
290 protein, was previously associated with PC [28]. The SNP associated to PC in this gene (rs10974808,  
291  $p = 3.53 \times 10^{-09}$ ) in our cohort has not been linked to PC by other studies to the best of our knowledge.  
292 Our strongest association (rs385893,  $p = 8.04 \times 10^{-10}$ ) was previously found to affect *JAK2*, a gene 400  
293 kb downstream of the locus and a key regulator of megakaryocyte maturation, illustrating that these  
294 SNPs may influence changes over large genetic regions [17]. This also highlights the difficulty

295 determining the exact mechanisms by which these SNPS alter components, such as RBC, given their  
296 large theoretical range of influence.

297

298 We present here two comprehensive PheWAS analyses of RBC components. The first examines  
299 whether additional phenotypic associations exist between SNPs associated to an RBC component in  
300 our cohort. The second groups extensive EHR phenotypic data from the Healthy Nevada Project  
301 clinical database into 1,488 different phenotype groups and examines the association (predictive value)  
302 between their incidence rate with continuous RBC component values. To the best of our knowledge,  
303 this is the first PheWAS targeted at RBC components. Not surprisingly, many of our strongest  
304 associations were with hematopoietic phenotypes, indicating that the incidence of having one (or more)  
305 abnormal hematopoietic characteristics is a potential predictor of RBC component levels. Interestingly,  
306 the incidence of having vitamin D deficiency may be linked to MPV levels and requires further study,  
307 as incident solar radiation in the Northern Nevada location of the study is high. Also of interest is that  
308 MCV and PC levels could be associated to the occurrence of (morbid) obesity, alcoholism and cirrhosis  
309 which are linked to poor vitamin D synthesis [65].

310

311 The identified associations between the RBD indices and hematopoietic findings and pathologies are  
312 mostly expected due to their known physiologic association and reconfirm previously reported  
313 findings. Iron deficiency anemia is often microcytic and characterized by reduced MCV [66]. Iron  
314 deficiency also affects megakaryocytes and may induce changes in megakaryocyte differentiation as  
315 well as increased platelet counts and volume [67]. As noted earlier, one of the strongest associations  
316 reported here is in the vicinity of JAK2, a known regulator of megakaryocytes maturation [68].

317

318 While thrombocytopenias are clearly synonymous with reduced PC, associated platelet volume and  
319 size changes can be used to differentiate between inherited macrothrombocytopenias and idiopathic



320 thrombocytopenic purpura (ITP) [69], thus establishing an association with MPV that may be positive  
321 or inverse. While this study demonstrated a strong negative association between PC and purpura, and a  
322 positive association with MPV, it is important to note that not all purpuras are necessarily caused by  
323 platelet deficiency. However, phenotypic groupings were not specific enough to identify associations  
324 with respect to specific etiologies (See Supplementary Table S3).

325

326 Vitamin D, independently, and in association with platelet activity and increased platelet indices, has  
327 been associated with cardiovascular disease [70]. The positive association between vitamin D  
328 deficiency and MPV levels is intriguing and follows other findings. Cumhur et al. [71] observed an  
329 inverse correlation between vitamin D levels and MPV and hypothesized that this may be due to  
330 increased release of proinflammatory cytokines present with vitamin D deficiency. Park et al. also  
331 reported an inverse association between PC and MPV and vitamin D levels in adults [72].

332

333 Platelet activation, as evidenced by platelet indices, is a recognized phenomenon in metabolic  
334 syndrome [73,74]. This study resulted in a positive association between PC and morbid obesity, and a  
335 negative association between MCV and obesity and morbid obesity. While previous evidence [75] does  
336 not necessarily support all-gender association between obesity and increased platelet counts, our  
337 finding may reflect an association between the central obesity of metabolic syndrome and the  
338 associated platelet activation of metabolic syndrome. However, the phenotype groups were not specific  
339 enough to allow for specific differentiation between obesity types (See Supplementary Table S3).

340

341 Thrombocytopenia is often observed in chronic liver disease and cirrhosis and platelet activation may  
342 play a role in liver regeneration [76,77]. Alcoholism is also associated with thrombocytopenia [78].  
343 However, evidence of an association between liver disease or alcoholism and platelet activation indices  
344 is lacking. Moreover, evidence points to platelet function defects in chronic alcoholism [79]. Thus, the



345 negative effect of PC on cirrhosis and positive effect of MCV on cirrhosis, alcoholism, and alcohol-  
346 related disorders found in this study is intriguing and merits further confirmation and research.

347

## 348 **Materials and Methods**

### 349 *The Renown EHR Database*

350 The Renown Health EHR system was instated in 2007 on the EPIC system (EPIC System Corporation,  
351 Verona, Wisconsin, USA), and currently contains lab results, diagnosis codes (ICD9 and ICD10) and  
352 demographics of more than 1 million patients seen in the hospital system since 2005.

353

### 354 *Sample Collection*

355 Saliva as a source of DNA was collected from 10,000 adults in Northern Nevada as the first phase of  
356 the Healthy Nevada Project to contribute to comprehensive population health studies in Nevada. The  
357 personal genetics company 23andMe® was used to genotype these individuals. using the Orogene®  
358 DX OGD-500.001 saliva kit [DNA Genotek, Ontario, Canada]. Genotypes are based on the Illumina  
359 Human OmniExpress-24 BeadChip platform [San Diego, CA, USA] including approximately 570,000  
360 SNPs.

361

### 362 *IRB and Ethics Statement*

363 The study was approved by our local Institutional Review Board (IRB, project 956068-12). Participants  
364 in the Healthy Nevada Project consent to having genetic information associated with electronic health  
365 information in a de-identified manner. Neither researchers nor participants have access to the complete  
366 EHR data and cannot map participants to patient identifiers. These data are not incorporated into the  
367 HER; rather, EHR and genetic data are linked in a separate environment via a unique identifier as  
368 approved by the IRB.

369

370 *Processing of EHR data*

371 Most cohort participants had multiple RBC recordings across thirteen years; in these cases, the mean  
372 age of each participant across those records was computed and later used as a covariate for each  
373 component in GWAS and PheWAS analyses. Normalization of test values was necessary as lab tests  
374 were updated across the 13 years of data collection. Many of the participants had lab results (for the  
375 same RBC component) recorded across different tests with different healthy reference ranges. For  
376 example, the 4,700 participants had measurements for MCV with respect to one or more of ten  
377 different MCV lab tests and corresponding healthy reference ranges. Many participants had records  
378 across several of these ten different tests. Only those tests/reference ranges having records for more  
379 than one individual were used in analyses. To standardize the RBC values across different normal  
380 reference ranges, a simple linear transform was computed using each test's reference range and the  
381 most recent test's range. All component measures within each separate test were then transformed into  
382 ranges of the most recent via each range's specific linear transform. The most recent healthy normal  
383 reference range for each component is listed in Table 1. Distributions of raw and transformed  
384 laboratory test values can be found in Supplementary Fig S5(A-C).

385

386 *Genotyping and Quality Control*

387 Genotyping was performed by 23andMe using the Illumina Infinum® DNA Human OmniExpress-24  
388 BeadChip V4. This genotyping platform (Illumina, San Diego, CA) consists of approximately 570,000  
389 SNPs. DNA extraction and genotyping were performed on saliva samples by the National Genetics  
390 Institute (NGI), a CLIA licensed clinical laboratory and a subsidiary of the Laboratory Corporation of  
391 America.

392

393 Raw genotype data were processed through a standard quality control process [46,47,80-82]. SNPs  
394 with a minor allele frequency (MAF) less than 0.01 were removed. SNPs that were out of HWE ( $p$ -  
395 value  $< 1 \times 10^{-6}$ ) were also excluded. Any SNP with call rate less than 95% was removed; any individual  
396 with a call rate less than 95% was also excluded from further study. Two pairs of participants were  
397 excluded due to high IBS (Identical by State) in all three cohorts). Additionally, twelve people were  
398 excluded due to high autosomal heterozygosity (FDR  $< 1\%$ ). This left 498,916 high-quality SNPs and  
399 4,699 participants in the MCV cohort with mean autosomal heterozygosity of 0.321. The same process  
400 yielded 4,591 participants for MPV with the same mean autosomal heterozygosity of 0.321. Similarly,  
401 the PC cohort consisted of 4,700 participants with same mean autosomal heterozygosity.

402

403 Additionally, a principal component analysis (PCA) was performed to identify principal components to  
404 correct for population substructure. Genotype data was pruned to exclude SNPs with high linkage  
405 disequilibrium using *PLINK* and standard pruning parameters of 50 SNPs per sliding window; window  
406 size of five SNPs;  $r^2=0.5$  [80]. Regression models were adjusted by the first four components,  
407 decreasing the genomic inflation factor of all RBC components to  $\lambda \leq 1.04$ , well within standard ranges  
408 [17,27,83].

409

410 *GWAS*

411 Using *PLINK* v1.9 [84], we performed a simple linear regression analysis with an assumed additive  
412 model (number of copies of the minor allele) including age, gender and the first four principal  
413 components as covariates to correct for any bias generated by these variables. Standardized values of  
414 all three components followed approximate normal distributions (Supplementary Fig S5(A-C) (row 2).  
415 Total phenotypic variance explained by the SNPs was calculated by first producing a genetic  
416 relationship matrix of all SNPs on autosomal chromosomes in *PLINK*. Subsequently, a restricted

417 maximum likelihood analysis was conducted using GTCA on the relationship matrix to estimate the  
418 variance explained by the SNPS.

419

420 A simple one-way ANOVA was performed on the mean RBC component values across the three  
421 genotypes. The raw  $p$ -values associated to the F-test statistic are included in Supplementary Table S2.  
422 QUANTO [85] was used to calculate power in our study. We found that for every combination of a  
423 SNP's effect size and its MAF, power was greater than 90% based on the approximately 4,500  
424 participants used for each SNP's analysis. Specifically, effect sizes ranged between [-0.62 11.49] (note  
425 that greater effect sizes are associated with greater mean component values) and MAFs ranged between  
426 [.073, 0.497]. These values are included in Table 2.

427

428 *PheWAS*

429 The **R** package PheWAS [86] was used to perform two independent PheWAS analyses. The first  
430 examined associations between statistically significant SNPs identified in an RBC GWAS and EHR  
431 phenotypes based on ICD9 codes. The second identified associations between RBC levels in our cohort  
432 and ICD9-based diagnoses only. ICD9 and ICD10 codes for each individual in the cohort recorded in  
433 the Renown EHR were aggregated via a mapping from the Center for Medicare and Medicaid services  
434 (<https://www.cms.gov/Medicare/Coding/ICD10/2018-ICD-10-CM-and-GEMs.html>). A total of 34,555  
435 individual diagnoses mapped to 6,632 documented ICD9 codes. ICD9 codes were aggregated and  
436 converted into 1,814 individual phenotype groups ("phecodes") using the PheWAS package as  
437 described in Carroll and Denny [86,87]. Of these, only the phecodes that included at least 20 cases  
438 were used for downstream analyses, following Carroll's protocol [86]: there were 1,488 phecodes with  
439 more than 20 cases in each PheWAS. Age, gender, and ethnicity were included in all PheWAS  
440 models. The first PheWAS detected associations between statistically significant SNPs ( $p < 5 \times 10^{-8}$ )  
441 identified in each of the three GWASs above and case/control status of EHR phenotypes represented by

442 ICD9 codes. Specifically, a logistic regression between the incidence (number of cases) of each  
 443 phenotype group (phecode) and the additive genotypes of each statistically significant SNP was  
 444 performed, using age and gender as covariates. Possible associations of 1,488 phecodes with each  
 445 previously detected SNP were assessed. The level of statistical significance was computed as a  
 446 Bonferroni correction for all possible associations per component:  $p=0.05/N_p/N_s$ , where  $N_p$  is the  
 447 number of phecodes tested and  $N_s$  is the number of SNPs examined in the specific blood component.  
 448 This significance level is represented by a red line in Supplementary Fig S3(A-C).  
 449 A second PheWAS, as outlined in Carroll et al. (2014) [86], was performed to examine associations  
 450 between each of the three quantitative RBC components and the phecode categories. Specifically, a  
 451 linear regression between the RBC measure and the case/control status of a phecode was performed  
 452 (with age and gender as covariates) for each of 1,488 phecodes. This analysis resulted in a number of  
 453 hematologic phenotypes that associated with RBC component levels (Table 4). A single-SNP  
 454 Bonferroni correction  $3.4 \times 10^{-5} = 0.05/N_p$  (with  $N_p=1,488$ ) was used to compute the level of statistical  
 455 significance. Phecodes with association levels  $p < 3.4 \times 10^{-5}$  are highlighted in Supplementary Fig S4 (A-  
 456 C). Note that two associations with MPV at slightly higher  $p$ -values ( $p=5.43 \times 10^{-5}$  and  $p=6.55 \times 10^{-5}$ ) are  
 457 also included; these are presented in the Discussion.

458 **Table 4. PheWAS Results for MPV, MCV and PC.**

| Phecode | Description                                              | Group                   | RBC | $\beta$ | SE   | $p$                    | N    |
|---------|----------------------------------------------------------|-------------------------|-----|---------|------|------------------------|------|
| 287.3   | Thrombocytopenia                                         | hematopoietic           | MPV | 0.75    | 0.11 | $9.06 \times 10^{-12}$ | 4104 |
| 287     | Purpura and other hemorrhagic conditions                 | hematopoietic           | MPV | 0.62    | 0.10 | $2.86 \times 10^{-10}$ | 4124 |
| 286.3   | Coagulation defects complicating pregnancy or postpartum | hematopoietic           | MPV | 2.47    | 0.39 | $3.66 \times 10^{-10}$ | 4029 |
| 655     | Known or suspected fetal abnormality affecting mother    | pregnancy complications | MPV | 0.56    | 0.11 | $8.85 \times 10^{-7}$  | 4455 |
| 798     | Malaise and fatigue                                      | symptoms                | MPV | 0.16    | 0.03 | $5.21 \times 10^{-6}$  | 4162 |
| 261     | Vitamin deficiency                                       | endocrine/metabolic     | MPV | 0.14    | 0.04 | $5.43 \times 10^{-5}$  | 4049 |
| 61.4    | Vitamin D deficiency                                     | endocrine/metabolic     | MPV | 0.14    | 0.04 | $6.55 \times 10^{-5}$  | 3992 |
|         |                                                          |                         |     |         |      |                        |      |
| 282.8   | Other hemoglobinopathies                                 | hematopoietic           | MCV | -12.18  | 0.87 | $1.97 \times 10^{-43}$ | 3751 |

|        |                                                              |                     |     |         |       |                        |      |
|--------|--------------------------------------------------------------|---------------------|-----|---------|-------|------------------------|------|
| 282    | Hereditary hemolytic anemias                                 | hematopoietic       | MCV | -10.33  | 0.82  | $8.62 \times 10^{-36}$ | 3754 |
| 280    | Iron deficiency anemias                                      | hematopoietic       | MCV | -3.76   | 0.36  | $1.30 \times 10^{-25}$ | 3854 |
| 278    | Overweight, obesity and other hyperalimentation              | endocrine/metabolic | MCV | -1.48   | 0.14  | $3.56 \times 10^{-25}$ | 4365 |
| 278.1  | Obesity                                                      | endocrine/metabolic | MCV | -1.71   | 0.17  | $2.01 \times 10^{-23}$ | 3874 |
| 280.1  | Iron deficiency anemias unspecified or not due to blood loss | hematopoietic       | MCV | -3.81   | 0.38  | $5.03 \times 10^{-23}$ | 3837 |
| 278.11 | Morbid obesity                                               | endocrine/metabolic | MCV | -2.04   | 0.21  | $6.83 \times 10^{-22}$ | 3540 |
| 281.9  | Deficiency anemias                                           | hematopoietic       | MCV | 8.73    | 1.10  | $2.60 \times 10^{-15}$ | 3743 |
| 289.9  | Abnormality of red blood cells                               | hematopoietic       | MCV | -7.30   | 1.08  | $1.94 \times 10^{-11}$ | 3742 |
| 289    | Other diseases of blood and blood-forming organs             | hematopoietic       | MCV | 2.84    | 0.43  | $7.37 \times 10^{-11}$ | 3827 |
| 317.11 | Alcoholic liver damage                                       | mental disorders    | MCV | 8.46    | 1.31  | $1.38 \times 10^{-10}$ | 4009 |
| 281    | Other deficiency anemia                                      | hematopoietic       | MCV | 4.55    | 0.73  | $4.33 \times 10^{-10}$ | 3759 |
| 317    | Alcohol-related disorders                                    | mental disorders    | MCV | 4.15    | 0.67  | $5.96 \times 10^{-10}$ | 4041 |
| 317.1  | Alcoholism                                                   | mental disorders    | MCV | 5.59    | 0.91  | $9.92 \times 10^{-10}$ | 4021 |
| 571.8  | Liver abscess and sequelae of chronic liver disease          | digestive           | MCV | 8.01    | 1.50  | $9.85 \times 10^{-8}$  | 3855 |
| 571.51 | Cirrhosis of liver without mention of alcohol                | digestive           | MCV | 7.22    | 1.42  | $3.61 \times 10^{-7}$  | 3856 |
| 342    | Hemiplegia                                                   | neurological        | MCV | -14.80  | 3.09  | $1.67 \times 10^{-6}$  | 4060 |
| 573.2  | Liver replaced by transplant                                 | digestive           | MCV | 14.01   | 2.99  | $2.97 \times 10^{-6}$  | 3849 |
| 571.81 | Portal hypertension                                          | digestive           | MCV | 9.80    | 2.12  | $4.00 \times 10^{-6}$  | 3851 |
| 250.4  | Abnormal glucose                                             | endocrine/metabolic | MCV | -0.88   | 0.19  | $6.30 \times 10^{-6}$  | 3946 |
| 250    | Diabetes mellitus                                            | endocrine/metabolic | MCV | -1.03   | 0.23  | $9.77 \times 10^{-6}$  | 3697 |
| 250.21 | Type 2 diabetes with ketoacidosis                            | endocrine/metabolic | MCV | 12.99   | 3.04  | $1.94 \times 10^{-5}$  | 3296 |
| 530.2  | Esophageal bleeding (varices/hemorrhage)                     | digestive           | MCV | 8.18    | 1.91  | $1.96 \times 10^{-5}$  | 3176 |
| 70.2   | Viral hepatitis B                                            | infectious diseases | MCV | -17.81  | 4.31  | $3.63 \times 10^{-5}$  | 4266 |
| 539    | Bariatric surgery                                            | digestive           | MCV | -1.98   | 0.48  | $3.71 \times 10^{-5}$  | 4550 |
|        |                                                              |                     |     |         |       |                        |      |
| 287.3  | Thrombocytopenia                                             | hematopoietic       | PC  | -85.15  | 6.56  | $9.17 \times 10^{-38}$ | 4104 |
| 287    | Purpura and other hemorrhagic conditions                     | hematopoietic       | PC  | -71.06  | 5.92  | $1.11 \times 10^{-32}$ | 4124 |
| 278    | Overweight, obesity and other hyperalimentation              | endocrine/metabolic | PC  | 14.23   | 1.97  | $6.12 \times 10^{-13}$ | 4366 |
| 284    | Aplastic anemia                                              | hematopoietic       | PC  | -98.52  | 14.12 | $3.54 \times 10^{-12}$ | 3749 |
| 284.1  | Pancytopenia                                                 | hematopoietic       | PC  | -100.90 | 15.03 | $2.16 \times 10^{-11}$ | 3747 |
| 278.1  | Obesity                                                      | endocrine/metabolic | PC  | 14.80   | 2.35  | $3.18 \times 10^{-10}$ | 3875 |
| 278.11 | Morbid obesity                                               | endocrine/metabolic | PC  | 17.70   | 2.92  | $1.56 \times 10^{-9}$  | 3541 |
| 571.51 | Cirrhosis of liver without mention of alcohol                | digestive           | PC  | -120.03 | 19.85 | $1.61 \times 10^{-9}$  | 3857 |

|        |                                                                  |                         |    |         |       |                       |      |
|--------|------------------------------------------------------------------|-------------------------|----|---------|-------|-----------------------|------|
| 571.8  | Liver abscess and sequelae of chronic liver disease              | digestive               | PC | -121.58 | 21.03 | $7.96 \times 10^{-9}$ | 3856 |
| 288.1  | Decreased white blood cell count                                 | hematopoietic           | PC | -32.91  | 5.82  | $1.68 \times 10^{-8}$ | 3832 |
| 287.31 | Primary thrombocytopenia                                         | hematopoietic           | PC | -134.74 | 25.98 | $2.24 \times 10^{-7}$ | 4028 |
| 286.3  | Coagulation defects complicating pregnancy or postpartum         | hematopoietic           | PC | -120.29 | 23.71 | $4.10 \times 10^{-7}$ | 4029 |
| 655    | Known or suspected fetal abnormality affecting mother            | pregnancy complications | PC | -35.93  | 7.09  | $4.27 \times 10^{-7}$ | 4455 |
| 571.81 | Portal hypertension                                              | digestive               | PC | -143.14 | 29.73 | $1.53 \times 10^{-6}$ | 3852 |
| 288.2  | Elevated white blood cell count                                  | hematopoietic           | PC | 22.82   | 4.99  | $4.88 \times 10^{-6}$ | 3875 |
| 395.2  | Nonrheumatic aortic valve disorders                              | circulatory system      | PC | -29.71  | 6.50  | $5.03 \times 10^{-6}$ | 4019 |
| 280.1  | Iron deficiency anemias unspecified or not due to blood loss     | hematopoietic           | PC | 24.29   | 5.74  | $2.36 \times 10^{-5}$ | 3838 |
| 555    | Inflammatory bowel disease and other gastroenteritis and colitis | digestive               | PC | 33.57   | 7.99  | $2.70 \times 10^{-5}$ | 3504 |

459 Table of phenotype groups (phecodes) reaching statistical significance ( $p < 3.4 \times 10^{-5}$ ) when associated to  
 460 continuous MPV, MCV and PC component values. Phecodes and their description, effect sizes ( $\beta$ ) of  
 461 the regression, standard error (SE), and  $p$ -values are included. Each phecode group contains at least 20  
 462 cases.  
 463

## 464 Data Availability Statement

### 465 EHR Data

466 EHR data for the Healthy Nevada cohort are subject to HIPAA and other privacy and compliance  
 467 restrictions. Mean standardized RBC component values for each individual are available in  
 468 Supplementary Table S1.  
 469

### 470 GWAS Results

471 To reduce the possibility of a privacy breach, 23andMe requires that the statistics for only 10,000 SNPs  
 472 be made publicly available. This is the amount of data considered by 23andMe to be insufficient to  
 473 enable a re-identification attack. The statistical summary results of the top 10,000 SNPs for the

474 23andMe data are available here: <https://www.dri.edu/grzyski2020>. All column definitions are listed  
475 in Table 5.

476 **Table 5. Column Identifiers for GWAS Results.**

| Column name  | Definition                                                          |
|--------------|---------------------------------------------------------------------|
| <b>CHR</b>   | Chromosome                                                          |
| <b>SNP</b>   | Individual SNP identifier                                           |
| <b>BP</b>    | Location of SNP on relative chromosome                              |
| <b>A1</b>    | Alternative Allele                                                  |
| <b>TEST</b>  | Selected statistical test – ADD represents the additive effect      |
| <b>NMISS</b> | Indicates the number of observations – non-missing genotypes        |
| <b>BETA</b>  | The effect size for this variant, defined per copy of the A1 allele |
| <b>SE</b>    | The standard error of the effect size                               |
| <b>LE</b>    | Lower end of the 95% confidence interval for the effect size        |
| <b>UE</b>    | Upper end of the 95% confidence interval for the effect size        |
| <b>STAT</b>  | The value of the test statistic                                     |
| <b>P</b>     | The p-value for the association test                                |

477 Table describing the column headers for the results file of our genome wide associations. This  
478 summary results file only lists the top 10,000 SNPs in order to prevent a re-identification attack.  
479

#### 480 *PheWAS Results*

481 Summarized counts of each ICD9 classification and phenotype group (phecode) are presented in  
482 Supplementary Table 3.

483

484 For more information please contact [joeg@dri.edu](mailto:joeg@dri.edu).

485

#### 486 **Acknowledgements**



487 We thank Michele Henderson, Toni Curreri and all the ambassadors of the Healthy Nevada Project. We  
488 also thank Iva Neveux for her helpful discussions with phenotypic data. We thank Renown Health and  
489 DRI marketing and all the folks at 23andMe who helped launch the project. Research support was  
490 provided by the Governor's Office of Economic Development Knowledge Fund. Support for the  
491 Healthy Nevada Project and personal genetics was provided by the Renown Health Foundation.

492

## 493 **References**

- 494 1. Letcher RL, Chien S, Pickering TG, Laragh JH. Elevated blood viscosity in patients with  
495 borderline essential hypertension. *Hypertension*. 1983;5: 757–762. doi:10.1161/01.hyp.5.5.757
- 496 2. Sharp DS, Curb JD, Schatz IJ, Meiselman HJ, Fisher TC, Burchfiel CM, et al. Mean red cell  
497 volume as a correlate of blood pressure. *Circulation*. 1996;93: 1677–1684.  
498 doi:10.1161/01.cir.93.9.1677
- 499 3. Sarnak MJ, Tighiouart H, Manjunath G, MacLeod B, Griffith J, Salem D, et al. Anemia as a risk  
500 factor for cardiovascular disease in the atherosclerosis risk in communities (aric) study. *J Am  
501 Coll Cardiol*. 2002;40: 27–33. doi:10.1016/s0735-1097(02)01938-1
- 502 4. Simone G de, Devereux RB, Chinali M, Best LG, Lee ET, Welty TK. Association of Blood  
503 Pressure With Blood Viscosity in American Indians The Strong Heart Study. *Hypertension*.  
504 2005;45: 625–630. doi:10.1161/01.hyp.0000157526.07977.ec
- 505 5. Chen Z, Tang H, Qayyum R, Schick UM, Nalls MA, Handsaker R, et al. Genome-wide  
506 association analysis of red blood cell traits in African Americans: the COGENT Network. *Hum  
507 Mol Genet*. 2013;22: 2529–2538. doi:10.1093/hmg/ddt087
- 508 6. Honn KV, Tang DG, Crissman JD. Platelets and cancer metastasis: a causal relationship? *Cancer  
509 Metastasis Rev*. 1992;11: 325–351.
- 510 7. Zoppo GJD. The role of platelets in ischemic stroke. *Neurology*. 1998;51: S9–S14.  
511 doi:10.1212/wnl.51.3\_suppl\_3.s9
- 512 8. Pain A, Ferguson DJP, Kai O, Urban BC, Lowe B, Marsh K, et al. Platelet-mediated clumping  
513 of *Plasmodium falciparum*-infected erythrocytes is a common adhesive phenotype and is  
514 associated with severe malaria. *Proc Natl Acad Sci U S A*. 2001;98: 1805–1810.  
515 doi:10.1073/pnas.98.4.1805
- 516 9. Willoughby S, Holmes A, Loscalzo J. Platelets and cardiovascular disease. *Eur J Cardiovasc  
517 Nurs*. 3rd ed. 2002;1: 273–288. doi:10.1016/S1474-51510200038-5
- 518 10. McBane RD, Karnicki K, Miller RS, Owen WG. The impact of peripheral arterial disease on  
519 circulating platelets. *Thromb Res*. 2004;113: 137–145. doi:10.1016/j.thromres.2004.02.007

- 520 11. Weber C. Platelets and chemokines in atherosclerosis: partners in crime. *Circ Res.* 2005;96:  
521 612–616. doi:10.1161/01.RES.0000160077.17427.57
- 522 12. Jain S, Harris J, Ware J. Platelets: linking hemostasis and cancer. *Arterioscler Thromb Vasc*  
523 *Biol.* 2010;30: 2362–2367. doi:10.1161/ATVBAHA.110.207514
- 524 13. Soranzo N, Rendon A, Gieger C, Jones CI, Watkins NA, Menzel S, et al. A novel variant on  
525 chromosome 7q22.3 associated with mean platelet volume, counts, and function. *Blood.*  
526 2009;113: 3831–3837. doi:10.1182/blood-2008-10-184234
- 527 14. Alper AT, Sevimli S, Hasdemir H, Nurkalem Z, Güvenç TS, Akyol A, et al. Effects of high  
528 altitude and sea level on mean platelet volume and platelet count in patients with acute coronary  
529 syndrome. *J Thromb Thrombolysis.* 3rd ed. Springer US; 2009;27: 130–134.  
530 doi:10.1007/s11239-007-0159-9
- 531 15. Hudson JG, Bowen AL, Navia P, Rios-Dalenz J, Pollard AJ, Williams D, et al. The effect of  
532 high altitude on platelet counts, thrombopoietin and erythropoietin levels in young Bolivian  
533 airmen visiting the Andes. *Int J Biometeorol.* Springer-Verlag; 1999;43: 85–90.  
534 doi:10.1007/s004840050120
- 535 16. Shrivastava A, Goyal A, (null) KN. Effect of high altitude on haematological parameters. *Indian*  
536 *J Prev Soc Med.* 2010;41: 2.
- 537 17. Soranzo N, Spector TD, Mangino M, Kühnel B, Rendon A, Teumer A, et al. A genome-wide  
538 meta-analysis identifies 22 loci associated with eight hematological parameters in the HaemGen  
539 consortium. *Nat Genet.* 2009;41: 1182–1190. doi:10.1038/ng.467
- 540 18. Shameer K, Denny JC, Ding K, Jouni H, Crosslin DR, Andrade M de, et al. A genome- and  
541 phenome-wide association study to identify genetic variants influencing platelet count and  
542 volume and their pleiotropic effects. *Hum Genet.* 2014;133: 95–109. doi:10.1007/s00439-013-  
543 1355-7
- 544 19. Lin J-P, O'Donnell CJ, Jin L, Fox C, Yang Q, Cupples LA. Evidence for linkage of red blood  
545 cell size and count: genome-wide scans in the Framingham Heart Study. *Am J Hematol.*  
546 2007;82: 605–610. doi:10.1002/ajh.20868
- 547 20. Thein SL, Menzel S, Peng X, Best S, Jiang J, Close J, et al. Intergenic variants of HBS1L-MYB  
548 are responsible for a major quantitative trait locus on chromosome 6q23 influencing fetal  
549 hemoglobin levels in adults. *Proc Natl Acad Sci U S A.* 2007;104: 11346–11351.  
550 doi:10.1073/pnas.0611393104
- 551 21. Lettre G, Sankaran VG, Bezerra MAC, Araújo AS, Uda M, Sanna S, et al. DNA polymorphisms  
552 at the BCL11A, HBS1L-MYB, and beta-globin loci associate with fetal hemoglobin levels and  
553 pain crises in sickle cell disease. *Proc Natl Acad Sci U S A.* 2008;105: 11869–11874.  
554 doi:10.1073/pnas.0804799105
- 555 22. Ferreira MAR, Hottenga J-J, Warrington NM, Medland SE, Willemsen G, Lawrence RW, et al.  
556 Sequence variants in three loci influence monocyte counts and erythrocyte volume. *Am J Hum*  
557 *Genet.* 2009;85: 745–749. doi:10.1016/j.ajhg.2009.10.005

- 558 23. Ganesh SK, Zakai NA, van Rooij FJA, Soranzo N, Smith AV, Nalls MA, et al. Multiple loci  
559 influence erythrocyte phenotypes in the CHARGE Consortium. *Nat Genet.* 2009;41: 1191–1198.  
560 doi:10.1038/ng.466
- 561 24. Meisinger C, Prokisch H, Gieger C, Soranzo N, Mehta D, Roskopf D, et al. A Genome-wide  
562 Association Study Identifies Three Loci Associated with Mean Platelet Volume. *Am J Hum*  
563 *Genet.* 2009;84: 66–71. doi:10.1016/j.ajhg.2008.11.015
- 564 25. Daly ME. Determinants of platelet count in humans. *Haematologica.* 2010;96: 10–13.  
565 doi:10.3324/haematol.2010.035287
- 566 26. Kamatani Y, Matsuda K, Okada Y, Kubo M, Hosono N, Daigo Y, et al. Genome-wide  
567 association study of hematological and biochemical traits in a Japanese population. *Nat Genet.*  
568 Nature Publishing Group; 2010;42: 210–215. doi:10.1038/ng.531
- 569 27. Kullo IJ, Ding K, Jouni H, Smith CY, Chute CG. A Genome-Wide Association Study of Red  
570 Blood Cell Traits Using the Electronic Medical Record. *PLoS ONE.* 2010;5: e13011.  
571 doi:10.1371/journal.pone.0013011
- 572 28. Gieger C, Radhakrishnan A, Cvejic A, Tang W, Porcu E, Pistis G, et al. New gene functions in  
573 megakaryopoiesis and platelet formation. *Nature.* 2011;480: 201–208. doi:10.1038/nature10659
- 574 29. Okada Y, Hirota T, Kamatani Y, Takahashi A, Ohmiya H, Kumasaka N, et al. Identification of  
575 nine novel loci associated with white blood cell subtypes in a Japanese population. *PLoS Genet.*  
576 2011;7: e1002067. doi:10.1371/journal.pgen.1002067
- 577 30. Paul DS, Nisbet JP, Yang T-P, Meacham S, Rendon A, Hautaviita K, et al. Maps of Open  
578 Chromatin Guide the Functional Follow-Up of Genome-Wide Association Signals: Application  
579 to Hematological Traits. *PLoS Genet.* 2011;7: e1002139. doi:10.1371/journal.pgen.1002139
- 580 31. An P, Wu Q, Wang H, Guan Y, Mu M, Liao Y, et al. *TMPRSS6*, but not *TF*, *TFR2* or *BMP2*  
581 variants are associated with increased risk of iron-deficiency anemia. *Hum Mol Genet.* 2012;21:  
582 2124–2131. doi:10.1093/hmg/dds028
- 583 32. Ding K, Shameer K, Jouni H, Masys DR, Jarvik GP, Kho AN, et al. Genetic Loci implicated in  
584 erythroid differentiation and cell cycle regulation are associated with red blood cell traits. *Mayo*  
585 *Clin Proc.* 2012;87: 461–474. doi:10.1016/j.mayocp.2012.01.016
- 586 33. Li J, Glessner JT, Zhang H, Hou C, Wei Z, Bradfield JP, et al. GWAS of blood cell traits  
587 identifies novel associated loci and epistatic interactions in Caucasian and African-American  
588 children. *Hum Mol Genet.* 2013;22: 1457–1464. doi:10.1093/hmg/dds534
- 589 34. Maurano MT, Humbert R, Rynes E, Thurman RE, Haugen E, Wang H, et al. Systematic  
590 Localization of Common Disease-Associated Variation in Regulatory DNA. *Science.* 2012;337:  
591 1190–1195. doi:10.1126/science.1222794
- 592 35. Qayyum R, Snively BM, Ziv E, Nalls MA, Liu Y, Tang W, et al. A meta-analysis and genome-  
593 wide association study of platelet count and mean platelet volume in african americans. *PLoS*  
594 *Genet.* 2012;8: e1002491. doi:10.1371/journal.pgen.1002491

- 595 36. van der Harst P, Zhang W, Mateo Leach I, Rendon A, Verweij N, Sehmi J, et al. Seventy-five  
596 genetic loci influencing the human red blood cell. *Nature*. 2012;492: 369–375.  
597 doi:10.1038/nature11677
- 598 37. Cardoso GL, Diniz IG, Silva ANLMD, Cunha DA, Silva Junior JSD, Uchôa CTC, et al. DNA  
599 polymorphisms at BCL11A, HBS1L-MYB and Xmn1-HBG2 site loci associated with fetal  
600 hemoglobin levels in sickle cell anemia patients from Northern Brazil. *Blood Cells Mol Dis*.  
601 2014;53: 176–179. doi:10.1016/j.bcmd.2014.07.006
- 602 38. Pei S-N, Ma M-C, You H-L, Fu H-C, Kuo C-Y, Rau K-M, et al. Tmprss6 rs855791  
603 Polymorphism Influences the Susceptibility to Iron Deficiency Anemia in Women at  
604 Reproductive Age. *Int J Med Sci*. 2014;11: 614–619. doi:10.7150/ijms.8582
- 605 39. Grote Beverborg N, Verweij N, Klip IT, van der Wal HH, Voors AA, van Veldhuisen DJ, et al.  
606 Erythropoietin in the general population: reference ranges and clinical, biochemical and genetic  
607 correlates. *PLoS ONE*. 2015;10: e0125215. doi:10.1371/journal.pone.0125215
- 608 40. Mtatiro SN, Mgaya J, Singh T, Mariki H, Rooks H, Soka D, et al. Genetic association of fetal-  
609 hemoglobin levels in individuals with sickle cell disease in Tanzania maps to conserved  
610 regulatory elements within the MYB core enhancer. *BMC Med Genet*. 2nd ed. 2015;16: 4.  
611 doi:10.1186/s12881-015-0148-3
- 612 41. Tapper W, Jones AV, Kralovics R, Harutyunyan AS, Zoi K, Leung W, et al. Genetic variation at  
613 MECOM, TERT, JAK2 and HBS1L-MYB predisposes to myeloproliferative neoplasms. *Nat*  
614 *Commun*. Nature Publishing Group; 2015;6: 1–11. doi:10.1038/ncomms7691
- 615 42. Lai Y, Chen Y, Chen B, Zheng H, Yi S, Li G, et al. Genetic Variants at BCL11A and HBS1L-  
616 MYB loci Influence Hb F Levels in Chinese Zhuang  $\beta$ -Thalassemia Intermedia Patients.  
617 *Hemoglobin*. 2016;40: 405–410. doi:10.1080/03630269.2016.1253586
- 618 43. Maharry SE, Walker CJ, Liyanarachchi S, Mehta S, Patel M, Bainazar MA, et al. Dissection of  
619 the Major Hematopoietic Quantitative Trait Locus in Chromosome 6q23.3 Identifies miR-3662  
620 as a Player in Hematopoiesis and Acute Myeloid Leukemia. *Cancer Discovery*. 2016;6: 1036–  
621 1051. doi:10.1158/2159-8290.CD-16-0023
- 622 44. Mikobi TM, Tshilobo Lukusa P, Aloni MN, Lumaka AZ, Kaba DK, Devriendt K, et al.  
623 Protective BCL11A and HBS1L-MYB polymorphisms in a cohort of 102 Congolese patients  
624 suffering from sickle cell anemia. *J Clin Lab Anal*. 2018;32. doi:10.1002/jcla.22207
- 625 45. Seiki T, Naito M, Hishida A, Takagi S, Matsunaga T, Sasakabe T, et al. Association of genetic  
626 polymorphisms with erythrocyte traits: Verification of SNPs reported in a previous GWAS in a  
627 Japanese population. *Gene*. 2018;642: 172–177. doi:10.1016/j.gene.2017.11.031
- 628 46. Verma A, Basile AO, Bradford Y, Kuivaniemi H, Tromp G, Carey D, et al. Phenome-Wide  
629 Association Study to Explore Relationships between Immune System Related Genetic Loci and  
630 Complex Traits and Diseases. *PLoS ONE*. 2016;11: e0160573.  
631 doi:10.1371/journal.pone.0160573
- 632 47. Verma A, Lucas A, Verma SS, Zhang Y, Josyula N, Khan A, et al. PheWAS and Beyond: The  
633 Landscape of Associations with Medical Diagnoses and Clinical Measures across 38,662

- 634 Individuals from Geisinger. *Am J Hum Genet.* 2018;102: 592–608.  
635 doi:10.1016/j.ajhg.2018.02.017
- 636 48. Yang J, Lee SH, Goddard ME, Visscher PM. GCTA: a tool for genome-wide complex trait  
637 analysis. *Am J Hum Genet.* 2011;88: 76–82. doi:10.1016/j.ajhg.2010.11.011
- 638 49. Yuan X, Waterworth D, Perry JRB, Lim N, Song K, Chambers JC, et al. Population-Based  
639 Genome-wide Association Studies Reveal Six Loci Influencing Plasma Levels of Liver  
640 Enzymes. *Am J Hum Genet.* 2008;83: 520–528. doi:10.1016/j.ajhg.2008.09.012
- 641 50. Panova-Noeva M, Schulz A, Hermanns MI, Grossmann V, Pefani E, Spronk HMH, et al. Sex-  
642 specific differences in genetic and nongenetic determinants of mean platelet volume: results  
643 from the Gutenberg Health Study. *Blood.* 2016;127: 251–259. doi:10.1182/blood-2015-07-  
644 660308
- 645 51. Chasman DI, Paré G, Mora S, Hopewell JC, Peloso G, Clarke R, et al. Forty-three loci  
646 associated with plasma lipoprotein size, concentration, and cholesterol content in genome-wide  
647 analysis. *PLoS Genet.* 2009;5: e1000730. doi:10.1371/journal.pgen.1000730
- 648 52. Chambers JC, Zhang W, Sehmi J, Li X, Wass MN, van der Harst P, et al. Genome-wide  
649 association study identifies loci influencing concentrations of liver enzymes in plasma. *Nat*  
650 *Genet.* 2011;43: 1131–1138. doi:10.1038/ng.970
- 651 53. Jin G, Sun J, Kim S-T, Feng J, Wang Z, Tao S, et al. Genome-wide association study identifies a  
652 new locus JMJD1C at 10q21 that may influence serum androgen levels in men. *Hum Mol Genet.*  
653 2012;21: 5222–5228. doi:10.1093/hmg/dd361
- 654 54. Coviello AD, Haring R, Wellons M, Vaidya D, Lehtimäki T, Keildson S, et al. A genome-wide  
655 association meta-analysis of circulating sex hormone-binding globulin reveals multiple Loci  
656 implicated in sex steroid hormone regulation. *PLoS Genet.* 2012;8: e1002805.  
657 doi:10.1371/journal.pgen.1002805
- 658 55. Grigorova M, Punab M, Poolamets O, Adler M, Vihljajev V, Laan M. Genetics of Sex  
659 Hormone-Binding Globulin and Testosterone Levels in Fertile and Infertile Men of  
660 Reproductive Age. *J Endocr Soc.* 2017;1: 560–576. doi:10.1210/js.2017-00050
- 661 56. Tajuddin SM, Schick UM, Eicher JD, Chami N, Giri A, Brody JA, et al. Large-Scale Exome-  
662 wide Association Analysis Identifies Loci for White Blood Cell Traits and Pleiotropy with  
663 Immune-Mediated Diseases. *Am J Hum Genet.* 2016;99: 22–39. doi:10.1016/j.ajhg.2016.05.003
- 664 57. Smyth DJ, Plagnol V, Walker NM, Cooper JD, Downes K, Yang JHM, et al. Shared and distinct  
665 genetic variants in type 1 diabetes and celiac disease. *N Engl J Med.* 2008;359: 2767–2777.  
666 doi:10.1056/NEJMoa0807917
- 667 58. de Boer YS, van Gerven NMF, Zwijs A, Verwer BJ, van Hoek B, van Erpecum KJ, et al.  
668 Genome-wide association study identifies variants associated with autoimmune hepatitis type 1.  
669 *Gastroenterology.* 2014;147: 443–52.e5. doi:10.1053/j.gastro.2014.04.022
- 670 59. Giusti B, Marcucci R, Saracini C, Gori AM, Valenti R, Parodi G, et al. Mean platelet volume  
671 and platelet count in acute coronary syndrome patients: role of a genetic variants on chr7q22.3



- 672 and chr3p13-p21. *Eur Heart J.* 2013;34: P4879–P4879. doi:10.1093/eurheartj/eh310.p4879
- 673 60. Johnson AD. The genetics of common variation affecting platelet development, function and  
674 pharmaceutical targeting. *J Thromb Haemost.* 2011;9 Suppl 1: 246–257. doi:10.1111/j.1538-  
675 7836.2011.04359.x
- 676 61. Zou S, Teixeira AM, Kostadima M, Astle WJ, Radhakrishnan A, Simon LM, et al. SNP in  
677 human ARHGEF3 promoter is associated with DNase hypersensitivity, transcript level and  
678 platelet function, and Arhgef3 KO mice have increased mean platelet volume. *PLoS ONE.*  
679 2017;12: e0178095. doi:10.1371/journal.pone.0178095
- 680 62. Goggs R, Williams CM, Mellor H, Poole AW. Platelet Rho GTPases—a focus on novel players,  
681 roles and relationships. *Biochem J.* 2015;466: 431–442. doi:10.1042/BJ20141404
- 682 63. Kojima H, Kanada H, Shimizu S, Kasama E, Shibuya K, Nakauchi H, et al. CD226 Mediates  
683 Platelet and Megakaryocytic Cell Adhesion to Vascular Endothelial Cells. *J Biol Chem.*  
684 2003;278: 36748–36753. doi:10.1074/jbc.M300702200
- 685 64. Crowder RJ, Enomoto H, Yang M, Johnson EM, Milbrandt J. Dok-6, a Novel p62 Dok Family  
686 Member, Promotes Ret-mediated Neurite Outgrowth. *J Biol Chem.* 2004;279: 42072–42081.  
687 doi:10.1074/jbc.M403726200
- 688 65. Konstantakis C, Tselekouni P, Kalafateli M, Triantos C. Vitamin D deficiency in patients with  
689 liver cirrhosis. *Ann Gastroenterol.* 2016;29: 297–306. doi:10.20524/aog.2016.0037
- 690 66. Massey AC. Microcytic anemia. Differential diagnosis and management of iron deficiency  
691 anemia. *Med Clin North Am.* 1992;76: 549–566.
- 692 67. Evstatiev R, Bukaty A, Jimenez K, Kulnigg Dabsch S, Surman L, Schmid W, et al. Iron  
693 deficiency alters megakaryopoiesis and platelet phenotype independent of thrombopoietin. *Am J*  
694 *Hematol.* Wiley Online Library; 2014;89: 524–529. doi:10.1002/ajh.23682
- 695 68. Besancenot R, Roos-Weil D, Tonetti C, Abdelouahab H, Lacout C, Pasquier F, et al. JAK2 and  
696 MPL protein levels determine TPO-induced megakaryocyte proliferation vs differentiation.  
697 *Blood.* 2014;124: 2104–2115. doi:10.1182/blood-2014-03-559815
- 698 69. Noris P, Klersy C, Gresele P, Giona F, Giordano P, Minuz P, et al. Platelet size for  
699 distinguishing between inherited thrombocytopenias and immune thrombocytopenia: a  
700 multicentric, real life study. *Br J Haematol.* 2013;162: 112–119. doi:10.1111/bjh.12349
- 701 70. Mozos I, Marginean O. Links between Vitamin D Deficiency and Cardiovascular Diseases.  
702 *Biomed Res Int.* Hindawi; 2015;2015: 109275–12. doi:10.1155/2015/109275
- 703 71. Cumhuri Cure M, Cure E, Yuce S, Yazici T, Karakoyun I, Efe H. Mean platelet volume and  
704 vitamin D level. *Ann Lab Med.* 2014;34: 98–103. doi:10.3343/alm.2014.34.2.98
- 705 72. Park YC, Kim J, Seo MS, Hong SW, Cho ES, Kim J-K. Inverse relationship between vitamin D  
706 levels and platelet indices in Korean adults. *Hematology.* 2017;22: 1–7.  
707 doi:10.1080/10245332.2017.1318334
- 708 73. Gaspar RS, Trostchansky A, Paes AM de A. Potential Role of Protein Disulfide Isomerase in

- 709 Metabolic Syndrome-Derived Platelet Hyperactivity. *Oxid Med Cell Longev*. Hindawi;  
710 2016;2016: 2423547–10. doi:10.1155/2016/2423547
- 711 74. Vaidya D, Yanek LR, Faraday N, Moy TF, Becker LC, Becker DM. Native platelet aggregation  
712 and response to aspirin in persons with the metabolic syndrome and its components. *Metab*  
713 *Syndr Relat Disord*. 2009;7: 289–296. doi:10.1089/met.2008.0083
- 714 75. Samocha-Bonet D, Justo D, Rogowski O, Saar N, Abu-Abeid S, Shenkerman G, et al. Platelet  
715 counts and platelet activation markers in obese subjects. *Mediators Inflamm*. 2008;2008:  
716 834153. doi:10.1155/2008/834153
- 717 76. Kurokawa T, Ohkohchi N. Platelets in liver disease, cancer and regeneration. *World J*  
718 *Gastroenterol*. 2017;23: 3228–3239. doi:10.3748/wjg.v23.i18.3228
- 719 77. Chauhan A, Adams DH, Watson SP, Lalor PF. Platelets: No longer bystanders in liver disease.  
720 *Hepatology*. Wiley-Blackwell; 2016;64: 1774–1784. doi:10.1002/hep.28526
- 721 78. Míguez-Burbano MJ, Nair M, Lewis JE, Fishman J. The role of alcohol on platelets, thymus and  
722 cognitive performance among HIV-infected subjects: are they related? *Platelets*. 2009;20: 260–  
723 267. doi:10.1080/09537100902964759
- 724 79. Mikhailidis DP, Jenkins WJ, Barradas MA, Jeremy JY, Dandona P. Platelet function defects in  
725 chronic alcoholism. *Br Med J (Clin Res Ed)*. British Medical Journal Publishing Group;  
726 1986;293: 715–718. doi:10.1136/bmj.293.6549.715
- 727 80. Anderson CA, Pettersson FH, Clarke GM, Cardon LR, Morris AP, Zondervan KT. Data quality  
728 control in genetic case-control association studies. *Nature Protocols*. Nature Publishing Group;  
729 2010;5: 1564–1573. doi:10.1038/nprot.2010.116
- 730 81. Schlauch KA, Khaiboullina SF, De Meirleir KL, Rawat S, Petereit J, Rizvanov AA, et al.  
731 Genome-wide association analysis identifies genetic variations in subjects with myalgic  
732 encephalomyelitis/chronic fatigue syndrome. *Transl Psychiatry*. 2016;6: e730–e730.  
733 doi:10.1038/tp.2015.208
- 734 82. Schlauch KA, Kulick D, Subramanian K, De Meirleir KL, Palotás A, Lombardi VC. Single-  
735 nucleotide polymorphisms in a cohort of significantly obese women without cardiometabolic  
736 diseases. *Int J Obes (Lond)*. Nature Publishing Group; 2018;106: 1656. doi:10.1038/s41366-  
737 018-0181-3
- 738 83. Winkler TW, Day FR, Croteau-Chonka DC, Wood AR, Locke AE, Mägi R, et al. Quality  
739 control and conduct of genome-wide association meta-analyses. *Nature Protocols*. 2014;9: 1192–  
740 1212. doi:10.1038/nprot.2014.071
- 741 84. Purcell S, Neale B, Todd-Brown K, Thomas L, Ferreira MAR, Bender D, et al. PLINK: A Tool  
742 Set for Whole-Genome Association and Population-Based Linkage Analyses. *Am J Hum Genet*.  
743 2007;81: 559–575. doi:10.1086/519795
- 744 85. Gauderman WJ. Sample size requirements for matched case-control studies of gene–  
745 environment interaction. *Stat Med*. Wiley Online Library; 2002;21: 35–50. doi:10.1002/sim.973

- 746 86. Carroll RJ, Bastarache L, Denny JC. R PheWAS: data analysis and plotting tools for phenome-  
747 wide association studies in the R environment. *Bioinformatics*. 2014;30: 2375–2376.  
748 doi:10.1093/bioinformatics/btu197
- 749 87. Denny JC, Bastarache L, Ritchie MD, Carroll RJ, Zink R, Mosley JD, et al. Systematic  
750 comparison of phenome-wide association study of electronic medical record data and genome-  
751 wide association study data. *Nat Biotechnol*. 2013;31: 1102–1110. doi:10.1038/nbt.2749
- 752
- 753



## 754 **Figure Legends**

### 755 **Fig 1: MCV GWAS Manhattan plot**

756 Genome-wide association study results for MCV. The x-axis represents the genomic position of  
757 498,916 SNPs. The y-axis represents  $-\log_{10}$ -transformed raw  $p$ -values of each genotypic association.  
758 The red horizontal line indicates the threshold of significance  $p=5 \times 10^{-8}$ .

759

### 760 **Fig 2: MCV PheWAS plot**

761 This figure illustrates the results of individual linear regression between incidence of phenotype groups  
762 (phecodes) and continuous MCV component measures. The model includes age, gender and ethnicity  
763 as covariates. Each point represents the  $p$ -value of the association between one of 1,488 phecodes with  
764 at least 20 cases assigned to it, and the MCV component measure. The horizontal red line represents  
765 the significance level  $p=3.4 \times 10^{-5}$ .

766

## 767 **Supplemental Figure and Table Legends**

### 768 **Supplementary Table 1: Mean standardized RBC component values**

769 This table includes mean standardized RBC component values for each individual along with age and  
770 gender. Due to the length of this table it can be found online at <https://www.dri.edu/grzyski2020>

### 771 772 **Supplementary Table 2: General SNP table for MPV, MCV and PC**

773 This table lists the 38 statistically significant SNPs associated to MPV, MCV and PC in our cohort.  
774 General information about the SNP such as chromosome location, GWAS *p*-value, power, genotype,  
775 cytoband, ANOVA, and references of associations identified in previous studies are listed.

### 776 777 **Supplementary Table 3: Counts of each phecode group**

778 This table presents the mapping between ICD9 codes and phecodes as presented in Carroll and the **R**  
779 package PheWAS [86] tested in our study, and the number of incidences from the RBC cohort in each  
780 phecode group.

### 781 782 **Supplementary Fig S1 (A, B, C): GWAS results for RBC components MPV, MCV and PC**

783 Genome-wide association study results for the three RBC components. The x-axis represents the  
784 genomic position of 498,916 SNPs. The y-axis represents  $-\log_{10}$ -transformed raw *p*-values of each  
785 genotypic association. The red horizontal line indicates the threshold of significance  $p=5 \times 10^{-8}$ .

### 786 787 **Supplementary Fig 2: ANOVA results of SNP rs7961894**

788 This figure shows the box and whisker diagram for standardized values of MPV of all members in the  
789 cohort based on genotype. Mean and standard deviation values for each genotype are CC:  $10.54 \pm 0.97$ ;  
790 CT:  $10.74 \pm 1.0$ ; TT:  $11.21 \pm 0.87$ . The *p*-value for this ANOVA analysis is  $p=8.7 \times 10^{-12}$ .

791

792 **Supplementary Fig S3 (A, B, C): PheWAS results between RBC component-significant SNPs and**  
793 **phecodes**

794 These three figures show the results of individual logistic regressions between incidence of phenotype  
795 groups (phecodes) and SNP genotypes, based on the additive model. Models include age, gender and  
796 ethnicity as covariates. Each point represents the  $p$ -value of one SNP and one of 1,488 phecodes with at  
797 least 20 cases assigned to it. The horizontal red line in each represents the significance level  
798  $p=1.60 \times 10^{-6}$  for MPV,  $p=2.40 \times 10^{-6}$  for MCV, and  $p=1.12 \times 10^{-5}$  for PC.

799

800 **Supplementary Fig S4 (A, B, C): PheWAS results between RBC component and phecodes**

801 These three figures show the results of individual linear regressions between incidence of phenotype  
802 groups (phecodes) and continuous RBC component measures. Models include age, gender and  
803 ethnicity as covariates. Each point represents the  $p$ -value of the association between one of 1,488  
804 phecodes with at least 20 cases assigned to it, and the RBC component measure. The horizontal red line  
805 in each represents the significance level  $p=1.60 \times 10^{-6}$  for MPV,  $p=2.40 \times 10^{-6}$  for MCV, and  $p=1.12 \times 10^{-5}$   
806 for PC.

807

808 **Supplementary Fig S5 (A, B, C): Raw and Standardized RBC Component Lab Measures**

809 Distribution of raw RBC component values are presented in the first row; distribution of component  
810 values upon standardization to the most recent lab test are shown in the second row; the QQ-plot of the  
811 standardized values is pictured in the third row.

812

## 813 **Author Contributions**

814 KAS and RWR conducted genetic and clinical data analysis and wrote the manuscript. GE, ADS and  
815 KAS contributed to the clinical discussion. WJM extracted participants and their clinical health data  
816 from the Renown EHR. RA and the 23andMe research team provided participant genotype data and  
817 edited the manuscript. JJG conceived of and obtained funds to conduct this experiment. All authors  
818 reviewed, edited and approved the final version of the manuscript.

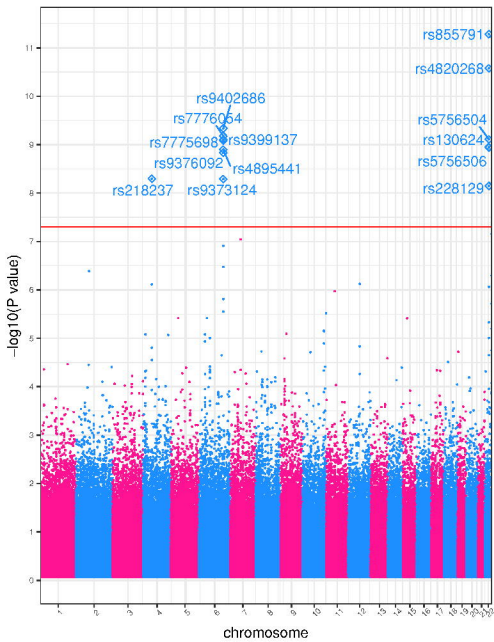

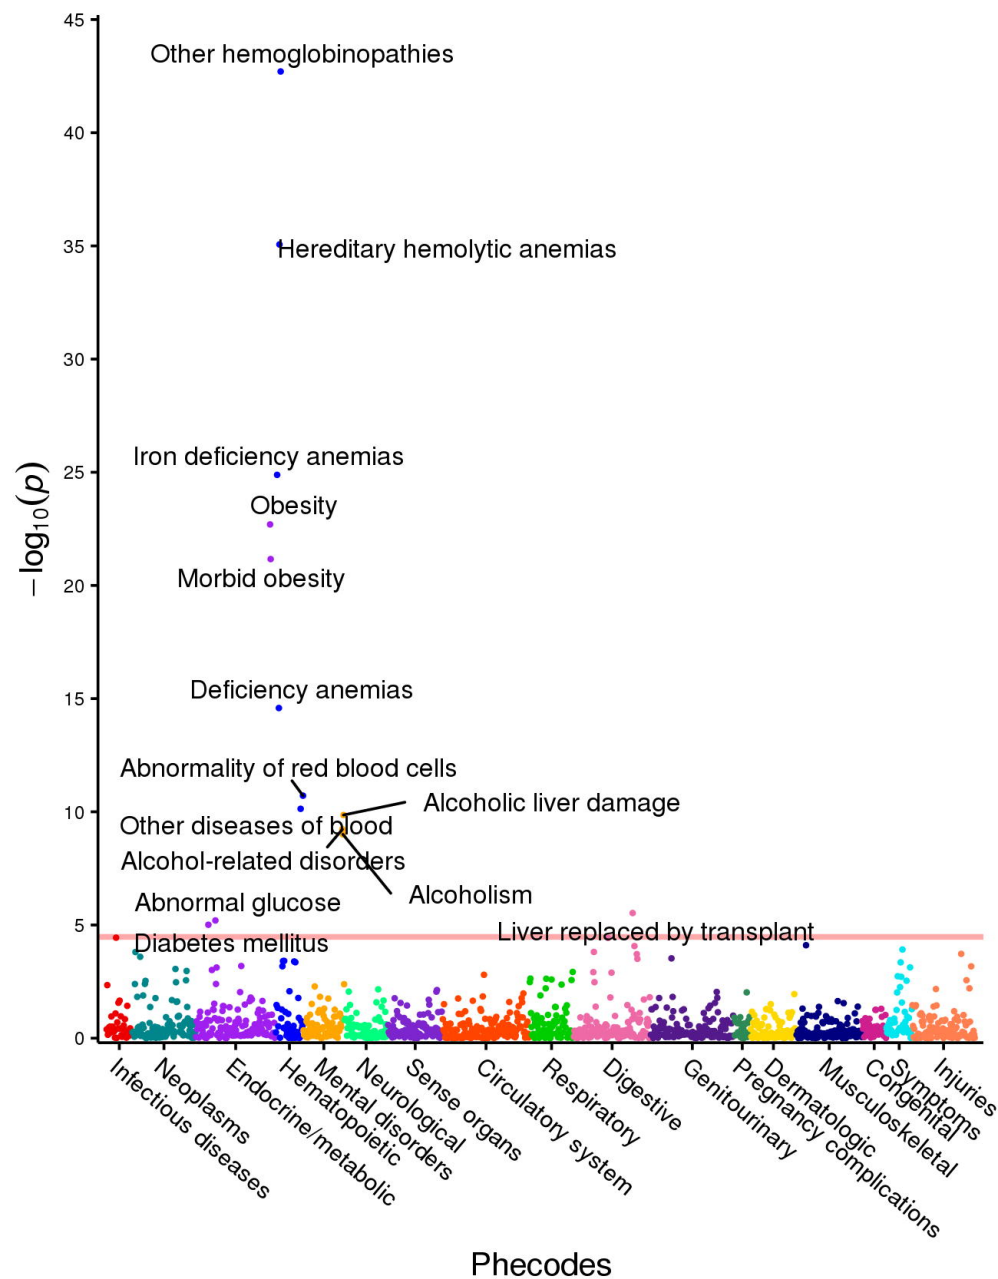

Source: https://www.biorxiv.org/content/10.1101/475467v1.full.pdf
